1 **Characterisation of AmpC Hyper-Producing *Escherichia coli* from Humans and Dairy**  
2 **Farms Collected in Parallel in the Same Geographical Region**

3

4 **Maryam Alzayn<sup>1,2</sup>, Jacqueline Findlay<sup>1</sup>, Hannah Schubert<sup>3</sup>, Oliver Mounsey<sup>1</sup>, Virginia**  
5 **C. Gould<sup>1,3</sup>, Kate J. Heesom<sup>4</sup>, Katy M. Turner<sup>3</sup>, David C. Barrett<sup>3</sup>, Kristen K. Reyher<sup>3</sup>,**  
6 **Matthew B. Avison<sup>1\*</sup>**

7

8 **<sup>1</sup>School of Cellular & Molecular Medicine, University of Bristol, Bristol, UK**

9 **<sup>2</sup>Biology Department, Faculty of Science, Princess Nourah Bint Abdulrahman**  
10 **University, Riyadh, Saudi Arabia**

11 **<sup>3</sup>Bristol Veterinary School, University of Bristol, Bristol, UK**

12 **<sup>4</sup>University of Bristol Proteomics Facility, Bristol, UK**

13

14 **\* Correspondence to: School of Cellular & Molecular Medicine, University of Bristol,**  
15 **Bristol, United Kingdom. [matthewb.avison@bris.ac.uk](mailto:matthewb.avison@bris.ac.uk)**

16

17

18 **Abstract**

19 **Objectives.** To characterise putative AmpC hyper-producing 3<sup>rd</sup> generation cephalosporin-  
20 resistant *E. coli* from dairy farms and their phylogenetic relationships as well as to identify risk  
21 factors for their presence; to assess evidence for their zoonotic transmission into the local  
22 human population

23 **Methods.** Proteomics was used to explain differences in antimicrobial susceptibility. Whole  
24 genome sequencing allowed phylogenetic analysis. Multilevel, multivariable logistic  
25 regression modelling was used to identify risk factors.

26 **Results.** Increased use of amoxicillin-clavulanate was associated with an increased risk of  
27 finding AmpC hyper-producers on farms. Expansion of cephalosporin resistance in AmpC  
28 hyper-producers was seen in farm isolates with *marR* mutations (conferring cefoperazone  
29 resistance) or when AmpC was mutated (conferring 4<sup>th</sup> generation cephalosporin and  
30 cefoperazone resistance). Phylogenetic analysis confirmed the dominance of ST88 amongst  
31 farm AmpC hyper-producers but there was no evidence for acquisition of farm isolates by  
32 members of the local human population.

33 **Conclusions.** In this two-year surveillance study of 53 dairy farms, AmpC hyper-production  
34 was the cause of cefotaxime resistance in 46.2% of *E. coli*. There was evidence of recent  
35 farm-to-farm transmission and of adaptive mutations to expand resistance. Whilst there was  
36 no evidence of isolates entering the local human population, efforts to reduce 3<sup>rd</sup> generation  
37 cephalosporin resistance on dairy farms must address the high prevalence of AmpC hyper-  
38 producers. The finding that amoxicillin-clavulanate use was associated with increased risk of  
39 finding AmpC hyper-producers is important because this is not currently categorised as a  
40 highest-priority critically important antimicrobial and so is not currently targeted for specific  
41 usage restrictions in the UK.

42

43

## 44 Introduction

45 *Escherichia coli* typically produce a class 1 cephalosporinase, encoded by the *ampC* gene,  
46 which is chromosomally located. Expression of *ampC* in wild-type cells is low and not enough  
47 to confer clinically relevant resistance to  $\beta$ -lactam antibiotics. Many mutations, insertions and  
48 gene duplication events have been shown to cause *ampC* hyper-expression, and this leads to  
49 varying spectra of  $\beta$ -lactam resistance, dependent on the actual amount of AmpC produced.<sup>1</sup>  
50 AmpC hyper-production was first seen in *E. coli* from human clinical samples in 1979,<sup>2</sup> and for  
51 a period before the emergence of plasmid-mediated extended spectrum  $\beta$ -lactamases, AmpC  
52 hyper-production was a dominant mechanism of 3<sup>rd</sup> generation cephalosporin (3GC)  
53 resistance in *E. coli* from humans.<sup>1</sup> This is no longer the case, however. For example, in a  
54 recent survey of cefotaxime resistant (CTX-R) *E. coli* from urine collected from people living  
55 in South West England, only 24/626 isolates (3.8%) were presumed to be AmpC hyper-  
56 producers because of their lack of horizontally acquired  $\beta$ -lactamase genes; whole genome  
57 sequencing (WGS) confirmed that 13/13 sequenced isolates had *ampC* promoter mutations  
58 typical of AmpC hyper-producers.<sup>3</sup>

59 AmpC is typical of class 1 enzymes in that it does not confer resistance to the 4<sup>th</sup> generation  
60 cephalosporins (4GC).<sup>1</sup> However, *ampC* structural variants of *E. coli*, expanding AmpC activity  
61 to include, for example, cefepime, have been identified from humans<sup>4-7</sup> and cattle;<sup>8</sup> these are  
62 dominated by isolates from the relatively less pathogenic phylogroup A, and particularly  
63 ST88,<sup>6, 8</sup> probably because expanded-spectrum activity evolves from existing AmpC hyper-  
64 producers, of which ST88 isolates are particularly common.<sup>9</sup>

65 We recently conducted a survey of 4594 samples collected from faecally contaminated sites  
66 on 53 dairy farms in South West England. We identified 384 samples, collected across 47  
67 farms, that were positive for the detectable growth of CTX-R *E. coli* isolates.<sup>10</sup> In an recent  
68 paper, we reported that 566/1226 of these CTX-R *E. coli* isolates (from 186 samples from 38  
69 farms) were PCR-negative for mobile cephalosporinases and so were presumed to be  
70 chromosomal AmpC hyper-producers.<sup>11</sup> If this presumption was correct, AmpC hyper-

71 production was the mechanism of resistance in 46.2% of CTX-R *E. coli* from dairy cattle in this  
72 region of the UK. This figure is comparable with the 42.9% presumed AmpC hyper-producers  
73 seen in CTX-R *E. coli* from dairy cattle in a recent nationwide Dutch study <sup>12</sup> and contrasts  
74 with the 3.8% of AmpC hyper-producers seen in CTX-R isolates in our recent study of human  
75 urinary *E. coli*.<sup>3</sup>

76 One aim of the work reported here was to characterise putative AmpC hyper-producing *E. coli*  
77 from our recent survey of dairy farms <sup>10,11</sup> and to identify risk factors for the presence of AmpC  
78 hyper-producers on these farms. Another aim was to investigate potential zoonotic  
79 transmission of AmpC hyper-producers by using WGS-based phylogenetic analysis to  
80 compare isolates from farms located within an approximately 50 x 50 km sub-region of the  
81 study with human urinary *E. coli* collected in parallel from this same sub-region .<sup>3</sup>

82

## 83 **Materials and Methods**

### 84 Bacterial isolates, identification and susceptibility testing

85 Isolates used in this study came from dairy farms located within a sub-region of the wider  
86 study area.<sup>10,11</sup> This region was chosen because it also included the locations of 146 GP  
87 practices that submitted urine samples for processing at the Severn Pathology laboratory, as  
88 described in a recently published survey of human urinary *E. coli*;<sup>3</sup> this laboratory was also the  
89 source of the human urinary isolates used in the present study. Disc susceptibility testing and  
90 microtiter MIC assays were performed and interpreted according to CLSI guidelines.<sup>13-15</sup>

### 91 Fluorescent Hoescht (H) 33342 dye accumulation assay

92 Envelope permeability in living bacteria was tested using a standard dye accumulation assay  
93 protocol <sup>16</sup> where the dye only fluoresces if it crosses the entire envelope and interacts with  
94 DNA. Overnight cultures in Cation Adjusted Muller Hinton Broth (CA-MHB) at 37°C were used  
95 to prepare CA-MHB subcultures, which were incubated at 37°C until a 0.6-0.8 OD<sub>600</sub> was

96 reached. Cells were pelleted by centrifugation (4000 rpm, 10 min; ALC, PK121R) and  
97 resuspended in 1 mL of phosphate-buffered saline. The optical densities of all suspensions  
98 were adjusted to 0.1 OD<sub>600</sub>. Aliquots of 180 µL of cell suspension were transferred to a black  
99 flat-bottomed 96-well plate (Greiner Bio-one, Stonehouse, UK). Eight technical replicates for  
100 each strain tested were in each column of the plate. The plate was transferred to a POLARstar  
101 spectrophotometer (BMG Labtech) and incubated at 37°C. Hoescht dye (H33342, 25 µM in  
102 water) was added to bacterial suspension of the plate using the plate-reader's auto-injector to  
103 give a final concentration of 2.5 µM per well. Excitation and emission filters were set at 355  
104 nm and 460 nm respectively. Readings were taken in intervals (cycles) separated by 150  
105 seconds (s). Thirty-one cycles were run in total. A gain multiplier of 1300 was used. Results  
106 were expressed as absolute values of fluorescence versus time.

#### 107 Proteomics

108 1 mL of an overnight CA-MHB culture were transferred to 50 mL CA-MHB and cells were  
109 grown at 37°C to 0.6-0.8 OD<sub>600</sub>. Cells were pelleted by centrifugation (10 min, 4,000×g, 4°C)  
110 and resuspended in 35 mL of 30 mM Tris-HCl, pH 8 and broken by sonication using a cycle  
111 of 1 s on, 0.5 s off for 3 min at amplitude of 63% using a Sonics Vibracell VC-505TM (Sonics  
112 and Materials Inc., Newton, Connecticut, USA). The sonicated samples were centrifuged at  
113 8,000 rpm (Sorval RC5B PLUS using an SS-34 rotor) for 15 min at 4°C to pellet intact cells  
114 and large cell debris. Protein concentrations in all supernatants were quantified using Biorad  
115 Protein Assay Dye Reagent Concentrate according to manufacturer's instructions. Proteins (1  
116 µg/lane) were separated by SDS-PAGE using 11% acrylamide, 0.5% bis-acrylamide (Biorad)  
117 gels and a Biorad Min-Protein Tetracell chamber model 3000X1. Gels were resolved at 200 V  
118 until the dye front had moved approximately 1 cm into the separating gel. Proteins in all gels  
119 were stained with Instant Blue (Expedeon) for 5 min and de-stained in water. LC-MS/MS data  
120 was collected as previously described.<sup>17</sup> The raw data files were processed and quantified  
121 using Proteome Discoverer software v1.4 (Thermo Scientific) and searched against bacterial  
122 genome and horizontally acquired resistance genes using as described previously.<sup>18</sup>

## 123 Whole genome sequencing and analyses

124 WGS was performed by MicrobesNG (<https://microbesng.uk/>) on a HiSeq 2500 instrument  
125 (Illumina, San Diego, CA, USA) using 2x250 bp paired end reads. Reads were trimmed using  
126 Trimmomatic<sup>19</sup> and assembled into contigs using SPAdes 3.13.0<sup>20</sup> ([https://  
127 http://cab.spbu.ru/software/spades/](https://http://cab.spbu.ru/software/spades/)). Resistance genes, plasmid replicon types and sequence  
128 types (according to the Achtman scheme<sup>21</sup>) were assigned using the ResFinder,<sup>22</sup>  
129 PlasmidFinder,<sup>23</sup> and MLST 2.0 on the Center for Genomic Epidemiology  
130 (<http://www.genomicepidemiology.org/>) platform. Contigs were annotated using Prokka 1.2.<sup>24</sup>

## 131 Phylogenetic analysis

132 Sequence alignment and phylogenetic analysis was carried out on the Bioconda software  
133 package<sup>25</sup> on the Cloud Infrastructure for Microbial Bioinformatics (CLIMB).<sup>26</sup> Sequences were  
134 first aligned to a closed read reference sequence and analysed for SNP differences, whilst  
135 omitting insertion and deletion elements, using the ‘Snippy’ alignment program. Alignment was  
136 then focused on regions of the genome found across all isolates, using the Snippy-core  
137 program, thus eliminating the complicating factors of insertions and deletions.<sup>27</sup> Aligned  
138 sequences were then used to construct a maximum likelihood phylogenetic tree using RAxML,  
139 utilising the GTRCAT model of rate heterogeneity and the software’s autoMR and rapid  
140 bootstrap to find the best-scoring maximum likelihood tree and including tree branch lengths,  
141 defined as the number of base substitutions per site compared.<sup>28, 29</sup> Finally, phylogenetic trees  
142 were illustrated using the web-based Microreact program.<sup>30</sup>

## 143 Risk factor analysis

144 Multivariable, multilevel logistic regression analysis was performed to identify risk factors for  
145 the presence of AmpC hyper-producers in samples collected from farms. Positivity for AmpC  
146 hyper-producing *E. coli* in a sample was defined by the growth of *E. coli* on cefotaxime agar  
147 which were PCR-negative for known horizontally-acquired cefotaxime resistance genes.<sup>11</sup> The

148 risk factor analysis methodology used has been described previously, including the use of a  
149 novel method using a logistic link function to account for measurement error.<sup>10</sup>

150

## 151 **Results and Discussion**

### 152 Confirmation of AmpC hyper-production and identification of porin loss and *marR* mutations 153 in *E. coli* from dairy farms

154 In order to further investigate putative AmpC hyper-producing *E. coli* isolates from dairy farms  
155 identified in our recent surveillance study,<sup>10,11</sup> antibiograms were determined for one putative  
156 AmpC hyper-producing isolate from each of 5 randomly selected farms. All isolates presented  
157 a typical AmpC-hyper-producing phenotype: resistance to ampicillin and cefalexin, and non-  
158 susceptibility to cefotaxime and ceftazidime. The isolate from Farm 1 was clearly different from  
159 the others - resistant to ceftazidime, cefotaxime, ceftriaxone, and non-susceptible to  
160 cefoperazone and cefepime based on disc testing (**Table 1**). MIC testing confirmed this  
161 difference for ceftazidime and cefepime, extending it into 3GC/4GCs licenced for use in cattle  
162 in the UK (**Table 2**). Relative to a non-AmpC hyper-producing control *E. coli* 17, all putative  
163 AmpC hyper-producers were non-susceptible to ceftazidime and ceftiofur (a 3GC used on  
164 several study farms during the period of sample collection) but not generally cefoperazone,  
165 cefepime or cefquinome (a 4GC used on some study farms during the period of sample  
166 collection). The MICs of the 4GCs cefepime and cefquinome were, respectively, 6 and 7  
167 doublings higher against the isolate from Farm 1 than against the control isolate, and 5  
168 doublings higher for each drug than against the isolate from Farm 2 (**Table 2**).

169 Using LC-MS/MS proteomics, AmpC hyper-production was confirmed in the isolate from Farm  
170 1, relative to a control *E. coli* 17, but AmpC production in this isolate was not more than in the  
171 other 4 confirmed AmpC hyper-producing isolates (**Table 3**). Sequencing the *ampC* promoter  
172 region revealed that all 5 AmpC hyper-producers had the same mutations, relative to the *E.*  
173 *coli* 17 control (**Figure 1**), which have previously been shown to cause *ampC* hyper-

174 expression.<sup>1</sup> Proteomics showed that, unlike the other 4 AmpC hyper-producers, the  
175 cefepime-resistant isolate from Farm 1 did not produce the OmpF porin (**Table 3**), and WGS  
176 revealed a loss of function mutation in *ompF* caused by the insertion of IS4 at nucleotide 625.  
177 OmpF porin loss did not noticeably affect envelope permeability in the Farm 1 isolate relative  
178 to the other 4 isolates or the *E. coli* 17 control (**Figure 2**). Indeed, the isolate from Farm 4 had  
179 markedly reduced permeability, reminiscent of an efflux hyper-production phenotype (constant  
180 reduced accumulation of the fluorescent dye; **Figure 2**) and yet it was not resistant to cefepime  
181 (**Table 2**). Proteomics confirmed hyper-production of AcrAB-TolC in the Farm 4 isolate and  
182 down regulation of OmpF porin (**Table 3**). This was reminiscent of a Mar phenotype and  
183 suspected loss of function mutation in *marR* was confirmed by WGS (causing a Pro57Thr  
184 change in MarR). As expected of a Mar isolate, the Farm 4 isolate was non-susceptible to  
185 minocycline and chloramphenicol, which are known AcrAB-TolC substrates. Other isolates  
186 resistant to these agents, were shown by WGS to carry specific mobile resistant genes (**Table**  
187 **1**). Interestingly, the Farm 4 isolate was cefoperazone-resistant (**Table 2**). It would seem,  
188 therefore, that a combination of AmpC plus AcrAB-TolC hyper-production and/or OmpF down  
189 regulation leads to cefoperazone resistance in *E. coli*. Cefoperazone has been, albeit rarely,  
190 used as a therapy for mastitis in dairy cows in the UK.

191 First identification of expanded-spectrum AmpC variants in *E. coli* from UK dairy farms and  
192 phylogenetic analysis of AmpC hyper-producers showing recent transmission between farms

193 Having ruled out additional AmpC hyper-production as the cause of 4GC and cefoperazone  
194 resistance in the isolate from Farm 1, we next looked at the *ampC* gene sequence. There were  
195 several sequence nucleotide polymorphisms from one *ampC* gene to the next amongst our 5  
196 representative isolates, but only one in the Farm 1 isolate stands out: causing a His312Pro  
197 change (His296Pro when considering the mature AmpC protein following removal of the signal  
198 peptide), a mutation previously shown to enhance the spectrum of AmpC hydrolytic activity.<sup>31</sup>

199 WGS showed that isolate Farm-WT had an identical *ampC* open reading frame and promoter  
200 sequence to that carried by the isolate from Farm 1, but without the single mutation predicted



201 to cause expanded-spectrum AmpC activity. We therefore selected a mutant (Farm-WT-M1)  
202 using ceftazidime at its agar dilution MIC (8 mg/L) using Muller Hinton Agar. The mutant did  
203 not have altered production of key resistance proteins relative to its parent, Farm-WT (**Table**  
204 **3**). Sequencing of the *ampC* gene from Farm-WT-M1 revealed an identical His296Pro  
205 mutation to that seen in the isolate from Farm 1, and the mutant had the same expanded-  
206 spectrum antibiogram as the isolate from Farm 1 (**Table 2**). Since Farm-WT-M1, like its parent,  
207 has wild type *ompF*, this confirmed that the insertional inactivation of *ompF* seen in the isolate  
208 from Farm 1 had little impact on the MICs of expanded-spectrum cephalosporins in the  
209 presence of an expanded-spectrum AmpC variant (**Table 2**).

210 We next performed WGS analysis of putative AmpC hyper-producers identified in our  
211 molecular epidemiology survey<sup>11</sup> from 25 farms across the core portion of our study area;<sup>10</sup>  
212 this area also included the locations of 146 GP practices involved in a parallel survey of human  
213 urinary *E. coli*.<sup>3</sup> All 25 representative isolates had the same *ampC* promoter mutation reported  
214 above (**Figure 1**). **Table 4** shows the spread of *E. coli* STs. Similar to a reported cattle study  
215 in France,<sup>8</sup> ST88 was dominant (10/25 isolates). Based on analysis of *ampC* sequence, only  
216 one other isolate (from Farm 22) was found to carry a known expanded-spectrum AmpC  
217 variant, in this case with the same His296Pro mutation as seen in the isolate from Farm 1.  
218 This isolate had the same expanded spectrum antibiogram as that from Farm 1 (**Table 2**).  
219 These 2 isolates, from farms 40 km apart, were both ST641 and only 64 SNPs apart in the  
220 core genome, based on phylogenetic analysis (**Figure 3**). This can be compared with SNP  
221 distances of 1-13 SNPs across 6 sequenced isolates collected from Farm 1 over a 12-month  
222 period. Interestingly, the *ompF* porin gene was intact in the isolate from Farm 22 so *ompF*  
223 disruption must have occurred following separation of the isolates. Measurement of MICs  
224 against the isolates provided further evidence that loss of *ompF* was not important for  
225 3GC/4GC resistance conferred by the expanded-spectrum AmpC in the isolate from Farm 1  
226 (**Table 2**). Interestingly, another ST641 isolate, from Farm 7 (which is 7 km from Farm 1), had  
227 1520 SNPs different from the isolate from Farm 1 (**Figure 3**) and did not have the expanded-

228 spectrum AmpC mutation or an *ompF* mutation; this isolate shared these properties with the  
229 isolate from Farm 14, which was only 35 SNPs (**Figure 3**) but 45 km away from Farm 7.

### 230 Risk factor analysis

231 The data presented above, when considered in conjunction with that in our recent survey,<sup>11</sup>  
232 show that 46.2% of CTX-R *E. coli* from dairy cattle across the 53 farms enrolled in our study  
233 were AmpC hyper-producers. This compares with 52.9% that were CTX-M producers, the  
234 remainder being plasmid AmpC producers.<sup>11</sup> Accordingly, attempts to reduce the prevalence  
235 of 3GC resistance on dairy farms must address the specific factors that are driving the  
236 accumulation of AmpC hyper-producers. In order to identify factors associated with an  
237 increased risk of finding CTX-R, AmpC hyper-producing *E. coli* in a sample from farms in our  
238 study, we performed risk factor analyses. Three farm-level fixed effects and 2 sample-level  
239 fixed effects were identified as important (**Table 5**). As seen with our risk factor analysis for  
240 *bla*<sub>CTX-M</sub>-positive CTX-R *E. coli* on the same farms,<sup>10</sup> samples collected from the environment  
241 of young calves were much more likely to be positive for AmpC hyper-producing *E. coli*  
242 ( $p < 0.001$ ) and samples collected from pastureland, including publicly accessible sites, were  
243 much less likely to be positive ( $p = 0.005$ ). We found no association between cephalosporin  
244 use – including 3GC use – and increased risk of finding AmpC hyper-producers. Interestingly,  
245 however, the total usage of amoxicillin-clavulanate was associated with a higher risk of finding  
246 AmpC hyper-producing *E. coli* on a farm ( $p = 0.001$ ). This association can be explained by  
247 direct selection since AmpC hyper-production confers amoxicillin-clavulanate resistance in *E.*  
248 *coli*.<sup>1</sup> This finding is important because amoxicillin-clavulanate is not currently identified as a  
249 highest-priority critically important antimicrobial (HP-CIA) by the World Health Organisation,<sup>32</sup>  
250 and, whilst great strides have been made within the UK farming industry to reduce antibiotic  
251 use,<sup>33</sup> there is a particular focus on reducing HP-CIA, e.g. 3GC use. The associations  
252 identified in our risk factor analysis suggest that reducing HP-CIAs without also reducing  
253 amoxicillin-clavulanate use may not impact on the prevalence of CTX-R, AmpC hyper-  
254 producing *E. coli* on farms. Indeed, a bigger concern is that reducing 3GC use on farms may

255 drive up amoxicillin-clavulanate use providing additional co-selective pressure for 3GC-  
256 resistant *E. coli*.

257 A final observation from this analysis is that average monthly temperature, which was  
258 identified as a strong risk factor for finding *bla*<sub>CTX-M</sub>-positive *E. coli* in this same survey of dairy  
259 farms,<sup>10</sup> was not identified as a risk factor for finding AmpC hyper-producing *E. coli*. This may  
260 be an issue of power, but the numbers of *bla*<sub>CTX-M</sub> *E. coli* positive and AmpC hyper-producing  
261 *E. coli* positive samples in the survey were similar (224 vs 186). It may be hypothesised,  
262 therefore, that carriage of (i.e. because of some fitness cost) or transmission rate for the  
263 horizontally acquired *bla*<sub>CTX-M</sub> is specifically affected by temperature, whereas the presence of  
264 chromosomal mutations in the *ampC* promoter leading to AmpC hyper-production is not.

265 No evidence for recent human/farm transmission of AmpC hyper-producing *E. coli* isolates  
266 collected in parallel in a 50 x 50 km region

267 We next looked at WGS data for 20 human urinary *E. coli* presumed to hyper-produce AmpC,  
268 collected during the same timeframe from people living in the same geographical range as the  
269 25 farms for which WGS data of AmpC hyper-producing *E. coli* had been obtained.<sup>3</sup>  
270 Proteomics confirmed AmpC hyper-production in 2 representative isolates: UTI-8 and UTI-9,  
271 with almost double the amount of AmpC in UTI-8 than in UTI-9 (**Table 3**). There were 9 different  
272 *ampC* promoter types seen across the 20 AmpC hyper-producing human isolates, though  
273 11/20 isolates carried the same promoter mutation seen in all 25 farm isolates, including UTI-  
274 8 and UTI-9, though UTI-8 also has an attenuator mutation at +37, which probably explain  
275 the higher level of AmpC seen in UTI-8 than UTI-9 (**Figure 4, Table 3**). None of the human  
276 isolates had mutations suggestive of an expanded spectrum AmpC variant, which was  
277 confirmed phenotypically using cefepime disc susceptibility testing.

278 Our final aim was to identify if there was any evidence of sharing AmpC hyper-producing *E.*  
279 *coli* between humans and cattle, since dominance of ST88 has previously been reported in  
280 humans in Northern Europe<sup>9</sup> and since we found an over-representation of ST88 on our farms

281 (Table 4). A phylogenetic tree drawn based on core genome comparison showed that the  
282 cattle and human isolates were intermixed only to a small extent, with only one human ST88  
283 isolate found (Figure 3). Importantly, all 10 ST88 cattle isolates were 15 or fewer SNPs apart,  
284 suggesting very recent farm-to-farm transmission; the human ST88 isolate (UTI-19) was, at  
285 its closest distance, 1279 SNPs different from the cattle isolates. The 2 other examples where  
286 isolates from the same ST were found in farm and human samples gave the same story  
287 (Figure 3): for ST75, the 2 human isolates (UTI-2 and UTI-15) were 60 SNPs apart, but the  
288 cattle isolate (Farm-6) was 1972 SNPs different at best. For ST23, the human and cattle  
289 isolates (UTI-13 and Farm-8, respectively) were 2754 SNPs different. Otherwise, there was  
290 no ST sharing, and all cattle isolates fell into phylogroups B1 and C (Table 4), with 8/20 human  
291 isolates falling into the highly pathogenic phylogroup B2, including a cluster of ST73 isolates  
292 of which 3 were only 2 SNPs apart.

### 293 Conclusions

294 AmpC hyper-production is a remarkably common mechanism of 3GC resistance in *E. coli* from  
295 dairy farms in our study - similar to a national survey in The Netherlands.<sup>12</sup> We have shown  
296 an association between amoxicillin-clavulanate use and the risk of finding AmpC hyper-  
297 producers on dairy farms and would caution against a blanket switch from 3/4GCs to  
298 amoxicillin-clavulanate in response to justifiable action to reduce HP-CIA use. However, our  
299 comparison between AmpC hyper-producing farm and human urinary *E. coli* in the same  
300 region provided no evidence of local sharing of AmpC hyper-producers between farms and  
301 the local human population. Accordingly, whilst reducing the on-farm prevalence of AmpC  
302 hyper-producing *E. coli* should be an important aim, the primary reason for achieving this  
303 would be to reduce the likelihood of difficult to treat infections in cattle rather than because of  
304 any direct zoonotic threat.

305

306

## 307 **Acknowledgements**

308 Genome sequencing was provided by MicrobesNG (<http://www.microbesng.uk>), which is  
309 supported by the BBSRC (grant number BB/L024209/1).

310

## 311 **Funding**

312 This work was funded by grant NE/N01961X/1 to M.B.A., K.M.T., D.C.B. and K.K.R. from the  
313 Antimicrobial Resistance Cross Council Initiative supported by the seven United Kingdom  
314 research councils. M.A. was in receipt of a postgraduate scholarship from the Saudi Cultural  
315 Bureau.

316

## 317 **Transparency declaration**

318 The authors declare no conflict of interests. Farming and veterinary businesses who  
319 contributed data and permitted access for sample collection were not involved in the design  
320 of this study or in data analysis and were not involved in drafting the manuscript for  
321 publication.

322

## 323 **References**

- 324 1. Jacoby GA. AmpC beta-lactamases. Clin Microbiol Rev. 2009 22:161-82.
- 325 2. Bergström S, Normark S. Beta-lactam resistance in clinical isolates of *Escherichia coli*  
326 caused by elevated production of the *ampC*-mediated chromosomal beta-lactamase.  
327 Antimicrob Agents Chemother. 1979 16:427-33.
- 328 3. Findlay J, Gould VC, North P et al. Characterisation of cefotaxime-resistant urinary  
329 *Escherichia coli* from primary care in South-West England 2017-2018. J Antimicrob  
330 Chemother. 2019 In Press. pii: dkz397. doi: 10.1093/jac/dkz397

- 331 4. Doi Y, Wachino J, Ishiguro M et al. Inhibitor-sensitive AmpC beta-lactamase variant  
332 produced by an *Escherichia coli* clinical isolate resistant to oxyiminocephalosporins and  
333 cephamycins. *Antimicrob Agents Chemother.* 2004 48:2652-8.
- 334 5. Mammeri H, Poirel L, Nordmann P. Extension of the hydrolysis spectrum of AmpC beta-  
335 lactamase of *Escherichia coli* due to amino acid insertion in the H-10 helix. *J Antimicrob*  
336 *Chemother.* 2007 60:490-4.
- 337 6. Crémet L, Caroff N, Giraudeau C et al. Occurrence of ST23 complex phylogroup A  
338 *Escherichia coli* isolates producing extended-spectrum AmpC beta-lactamase in a French  
339 hospital. *Antimicrob Agents Chemother.* 2010 54:2216-8.
- 340 7. Bogaerts P, Rodriguez-Villalobos H, Laurent C et al. Emergence of extended-spectrum-  
341 AmpC-expressing *Escherichia coli* isolates in Belgian hospitals. *J Antimicrob Chemother.*  
342 2009 63:1073-5.
- 343 8. Haenni M, Châtre P, Madec JY. Emergence of *Escherichia coli* producing extended-  
344 spectrum AmpC  $\beta$ -lactamases (ESAC) in animals. *Front Microbiol.* 2014 5:53.
- 345 9. Guillouzouic A, Caroff N, Dauvergne S et al. MLST typing of *Escherichia coli* isolates  
346 overproducing AmpC {beta}-lactamase. *J Antimicrob Chemother.* 2009 63:1290-2.
- 347 10. Schubert H, Findlay J, Morley K et al. Evidence for reduced CTX-M carriage in cattle-  
348 associated *Escherichia coli* at low temperatures and on publicly accessible farmland:  
349 implications for surveillance and potential for farm-to-human transmission. *BioRxiv* 2019  
350 doi: <https://doi.org/10.1101/778407>.
- 351 11. Findlay J, Schubert H, Morley K et al. Molecular epidemiology of cefotaxime-resistant  
352 *Escherichia coli* from dairy farms in South West England identifies a dominant plasmid  
353 encoding CTX-M-32. Submitted.
- 354 12. Ceccarelli D, Kant A, van Essen-Zandbergen A et al. Diversity of Plasmids and Genes  
355 Encoding Resistance to Extended Spectrum Cephalosporins in Commensal *Escherichia*  
356 *coli* From Dutch Livestock in 2007-2017. *Front Microbiol.* 2019 10:76.

- 357 13. Clinical and Laboratory Standards Institute. Performance Standards for Antimicrobial Disk  
358 Susceptibility Tests – Thirteenth Edition: Approved Standard M2-A13. CLSI, Wayne, PA,  
359 USA. 2018.
- 360 14. Clinical and Laboratory Standards Institute. Methods for Dilution Antimicrobial  
361 Susceptibility Tests for Bacteria That Grow Aerobically – Tenth Edition: Approved  
362 Standard M7-A10. CLSI, Wayne, PA, USA. 2015.
- 363 15. Clinical and Laboratory Standards Institute. Performance Standards for Antimicrobial  
364 Susceptibility Testing: Twenty-Ninth Informational Supplement M100-S29. CLSI, Wayne,  
365 PA, USA. 2019.
- 366 16. Coldham NG, Webber M, Woodward MJ et al. A 96-well plate fluorescence assay for  
367 assessment of cellular permeability and active efflux in *Salmonella enterica* serovar  
368 Typhimurium and *Escherichia coli*. J Antimicrob Chemother 2010; 65:1655–63.
- 369 17. Wan Nur Ismah WAK, Takebayashi Y, Findlay J et al. Prediction of fluoroquinolone  
370 susceptibility directly from whole genome sequence data using liquid chromatography-  
371 tandem mass spectrometry to identify mutant genotypes. Antimicrob Agents Chemother  
372 2018;62:e01814-17.
- 373 18. Takebayashi Y, Wan Nur Ismah WAK, Findlay J et al. Prediction of cephalosporin and  
374 carbapenem susceptibility in multi-drug resistant gram-negative bacteria using liquid  
375 chromatography-tandem mass spectrometry. BioRxiv 2017.  
376 <https://doi.org/10.1101/138594>.
- 377 19. Bolger AM, Lohse M, Usadel B. Trimmomatic: a flexible trimmer for Illumina sequence  
378 data. Bioinformatics 2014; 30: 2114-20.
- 379 20. Bankevich A, Nurk S, Antipov D et al. SPAdes: a new genome assembly algorithm and its  
380 applications to single-cell sequencing. Journal of computational biology. Journal of  
381 Computational Molecular Cell Biology 2012; 19: 455-77.
- 382 21. Wirth T, Falush D, Lan R et al. Sex and virulence in *Escherichia coli*: an evolutionary  
383 perspective. Mol Microbiol 2006; 60: 1136-51.

- 384 22. Zankari E, Hasman H, Cosentino S et al. Identification of acquired antimicrobial resistance  
385 genes. *J Antimicrob Chemother* 2012; 67: 2640-4.
- 386 23. Carattoli A, Zankari E, Garcia-Fernandez A et al. In silico detection and typing of plasmids  
387 using PlasmidFinder and plasmid multilocus sequence typing. *Antimicrob Agents*  
388 *Chemother* 2014; 58: 3895-903.
- 389 24. Seemann T. Prokka: rapid prokaryotic genome annotation. *Bioinformatics* 2014; 30: 2068-  
390 9.
- 391 25. Grüning B, Dale R, Sjödin A et al. Bioconda: sustainable and comprehensive software  
392 distribution for the life sciences. *Nature Methods*. 2018; 15:475-6.
- 393 26. Connor TR, Loman NJ, Thompson S et al. CLIMB (the Cloud Infrastructure for Microbial  
394 Bioinformatics): an online resource for the medical microbiology community. *Microbial*  
395 *genomics*. 2016;2(9):e000086-e.
- 396 27. Seemann T. Snippy: fast bacterial variant calling from NGS reads. 3.2-dev ed2015.
- 397 28. Stamatakis A. RAxML-VI-HPC: maximum likelihood-based phylogenetic analyses with  
398 thousands of taxa and mixed models. *Bioinformatics (Oxford, England)*.  
399 2006;22(21):2688-90.
- 400 29. Stamatakis A, Meier H, Ludwig T. RAxML-III: a fast program for maximum likelihood-based  
401 inference of large phylogenetic trees. *Bioinformatics (Oxford, England)*. 2004;21(4):456-  
402 63.
- 403 30. Argimon S, Abudahab K, Goater RJ et al. Microreact: visualizing and sharing data for  
404 genomic epidemiology and phylogeography. *Microbial genomics*. 2016;2(11):e000093.
- 405 31. Mammeri H, Poirel L, Fortineau N et al. Naturally occurring extended-spectrum  
406 cephalosporinases in *Escherichia coli*. *Antimicrob Agents Chemother*. 2006 50:2573-6.
- 407 32. World Health Organisation. Critically important antimicrobials for human medicine:  
408 Ranking of medically important antimicrobials for risk management of antimicrobial  
409 resistance due to non-human use. 5th Revision 2016.  
410 <http://apps.who.int/iris/bitstream/handle/10665/255027/9789241512220-eng.pdf>



411 33. UK Veterinary Antibiotic Resistance and Sales Surveillance Report (UK-VARSS 2017).

412 New Haw, Addlestone: Veterinary Medicines Directorate.

413

414 **Table 1. Disc susceptibility for putative AmpC hyper-producing *E. coli* isolates from**  
 415 **dairy farms**

416

|                  | Farm | Farm | Farm | Farm | Farm |
|------------------|------|------|------|------|------|
|                  | 1    | 2    | 3    | 4    | 5    |
| Ampicillin       | R    | R    | R    | R    | R    |
| Cefalexin        | R    | R    | R    | R    | R    |
| Cefotetan        | S    | S    | S    | S    | S    |
| Cefotaxime       | R    | I    | I    | I    | I    |
| Ceftazidime      | R    | I    | I    | I    | I    |
| Ceftriaxone      | R    | S    | S    | S    | S    |
| Cefoperazone     | I    | S    | S    | S    | S    |
| Cefepime         | I    | S    | S    | S    | S    |
| Aztreonam        | S    | S    | S    | S    | S    |
| Meropenem        | S    | S    | S    | S    | S    |
| Chloramphenicol  | S    | S    | S    | I    | R    |
| Minocycline      | R    | R    | R    | I    | R    |
| <i>tetA</i> gene | Y    | Y    | Y    | N    | Y    |
| <i>floR</i> gene | N    | N    | N    | N    | N    |

431

432

433

434

435 **Table 2. MICs of 3GC/4GCs against putative AmpC hyper-producing *E. coli* isolates**  
436 **from dairy farms**

437

| Isolate    | MIC µg/ml                |                        |                       |                         |                             |
|------------|--------------------------|------------------------|-----------------------|-------------------------|-----------------------------|
|            | Ceftazidime <sup>h</sup> | Ceftiofur <sup>c</sup> | Cefepime <sup>h</sup> | Cefquinome <sup>c</sup> | Cefoperazone <sup>h,c</sup> |
| EC17       | 0.25                     | 0.5                    | 0.125                 | 0.03                    | 0.25                        |
| Farm-1     | 256                      | 16                     | 8                     | 4                       | 64                          |
| Farm-2     | 16                       | 4                      | 0.25                  | 0.125                   | 4                           |
| Farm-3     | 16                       | 4                      | 0.125                 | 0.125                   | 4                           |
| Farm-4     | 32                       | 4                      | 0.5                   | 0.5                     | 32                          |
| Farm-WT    | 8                        | 8                      | 1                     | 2                       | 8                           |
| Farm-WT-M1 | 128                      | 8                      | 8                     | 8                       | 32                          |
| Farm-22    | 128                      | 4                      | 8                     | 4                       | 32                          |

438

439 Cephalosporins highlighted “h” are used in humans and those highlighted with “c” are  
440 licenced for use in cattle in the UK.

441

442

443 **Table 3. Abundance of key resistance proteins in putative AmpC hyper-producing *E.***  
 444 ***coli* from dairy farms and human urinary tract infections**

445 Protein abundance is reported relative to the average abundance of ribosomal proteins in a  
 446 cell extract and is a mean +/- standard error of the mean, (n=3). Proteins whose abundance  
 447 is significantly (p<0.05) up or downregulated at least 2-fold relative to the EC17 control (see  
 448 methods) are shaded in red or green, respectively.

449

| Accession | Description | EC17          | Farm-1         | Farm-2         | Farm-3         | Farm-4         | Farm-WT        | Farm-WT-M1     | UTI-8         | UTI-9         |
|-----------|-------------|---------------|----------------|----------------|----------------|----------------|----------------|----------------|---------------|---------------|
| P02931    | OmpF        | 0.69<br>±0.36 | 0.02*<br>±0.03 | 0.99<br>±0.36  | 1.03<br>±0.34  | 0.12*<br>±0.08 | 1.54<br>±1.34  | 0.81<br>±0.24  | 0.86±<br>0.18 | 0.43±<br>0.31 |
| P00811    | AmpC        | ND            | 0.79*<br>±0.19 | 0.86*<br>±0.20 | 0.89*<br>±0.16 | 0.96*<br>±0.20 | 1.13*<br>±0.77 | 0.76*<br>±0.24 | 2.13±<br>0.37 | 1.35±<br>0.34 |
| P0AE06    | AcrA        | 0.10<br>±0.04 | 0.13<br>±0.05  | 0.18<br>±0.15  | 0.11<br>±0.03  | 0.20*<br>±0.01 | 0.13<br>±0.07  | 0.12<br>±0.02  | 0.14±<br>0.02 | 0.16±<br>0.03 |
| P31224    | AcrB        | 0.07<br>±0.01 | 0.07<br>±0.06  | 0.14*±<br>0.03 | 0.08<br>±0.08  | 0.11*<br>±0.02 | 0.04<br>±0.01  | 0.05<br>±0.01  | 0.07±<br>0.02 | 0.07±<br>0.02 |
| P02930    | TolC        | 0.12<br>±0.06 | 0.08<br>±0.07  | 0.13<br>±0.02  | 0.12<br>±0.02  | 0.39*<br>±0.09 | 0.19<br>±0.10  | 0.19<br>±0.05  | 0.16<br>±0.03 | 0.10<br>±0.04 |

450

451

452 **Table 4. Sequence types of representative AmpC hyper-producing isolates from 25**  
453 **dairy farms**

454

| <b>Isolate</b> | <b>ST</b> | <b>Phylogroup</b> |
|----------------|-----------|-------------------|
| Farm-1         | 641       | B1                |
| Farm-2         | 88        | C                 |
| Farm-3         | 88        | C                 |
| Farm-4         | 388       | B1                |
| Farm-5         | 88        | C                 |
| Farm-6         | 75        | B1                |
| Farm-7         | 641       | B1                |
| Farm-8         | 23        | C                 |
| Farm-9         | 162       | B1                |
| Farm-10        | 88        | C                 |
| Farm-11        | 2522      | B1                |
| Farm-12        | 88        | C                 |
| Farm-13        | 278       | B1                |
| Farm-14        | 641       | B1                |
| Farm-15        | 88        | C                 |
| Farm-16        | 278       | B1                |
| Farm-17        | 661       | B1                |
| Farm-18        | 88        | C                 |
| Farm-19        | 88        | C                 |
| Farm-20        | 278       | B1                |
| Farm-21        | 345       | B1                |
| Farm-22        | 641       | B1                |
| Farm-23        | 88        | C                 |
| Farm-24        | 278       | B1                |
| Farm-25        | 88        | C                 |

455

456

457

458

459 **Table 5.** Significant associations ( $p < 0.05$ ) with AmpC hyper-producing *E. coli* from dairy  
460 farms from the multilevel, multivariable logistic regression model

| <b>Risk factor</b>                                               | <b>Odds ratio [95% confidence interval]</b> | <b>p</b> |
|------------------------------------------------------------------|---------------------------------------------|----------|
| Sample taken from the environment of pre-weaned heifers          | 3.93 [2.72, 5.67]                           | <0.001   |
| Total usage of amoxicillin-clavulanate on the farm               | 1.16 [1.06, 1.27]                           | 0.001    |
| Routine use of vaccination against respiratory disease in calves | 2.72 [1.34, 5.56]                           | 0.005    |
| Samples taken from pastureland                                   | 0.32 [0.14, 0.72]                           | 0.005    |
| Calving all-year-round as opposed to in seasonal blocks          | 3.97 [1.45, 10.86]                          | 0.006    |

461

462

463

464

465

466

467

468

469

470

471

472

473

474

475

476

477 **Figures**

478 **Figure 1. Promoter/attenuator sequences for *ampC* from 5 farm *E. coli* AmpC hyper-**  
 479 **producing isolates in comparison with a wild-type *E. coli* EC17**

480 Modified residues relative to the transcriptional start site are noted and the novel promoter  
 481 created is annotated.

482

483

484

485

486

487

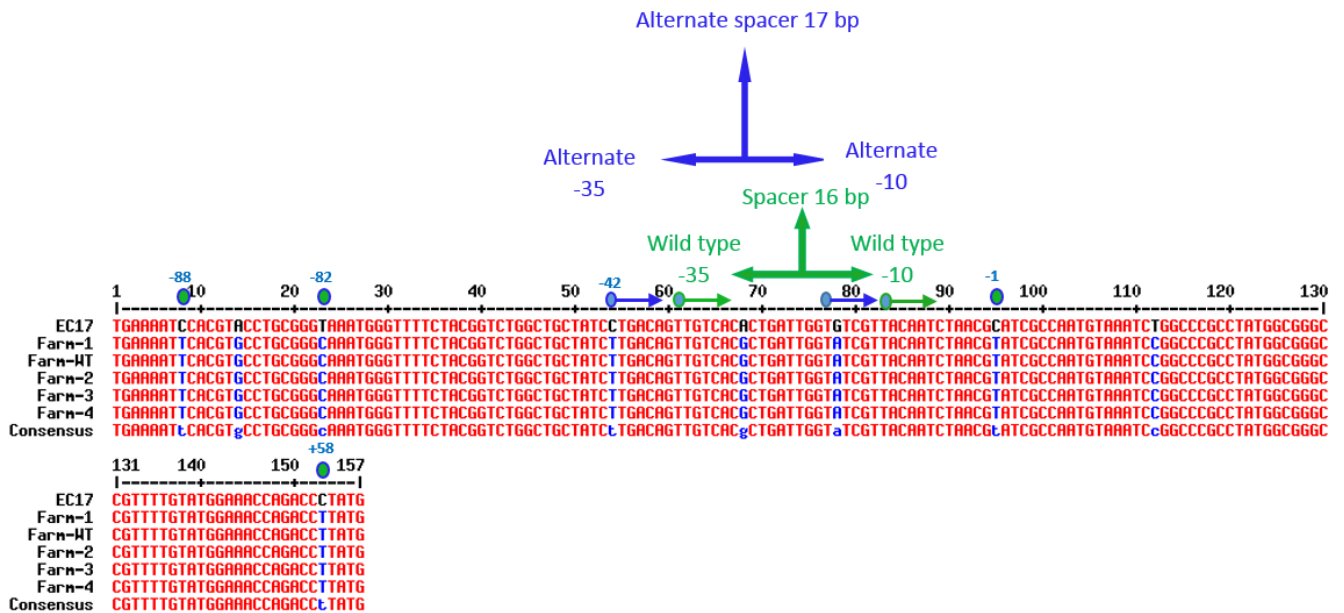

488 **Figure 2. Envelope permeability of AmpC hyper-producing *E. coli* determined using**  
489 **fluorescent dye accumulation assays**

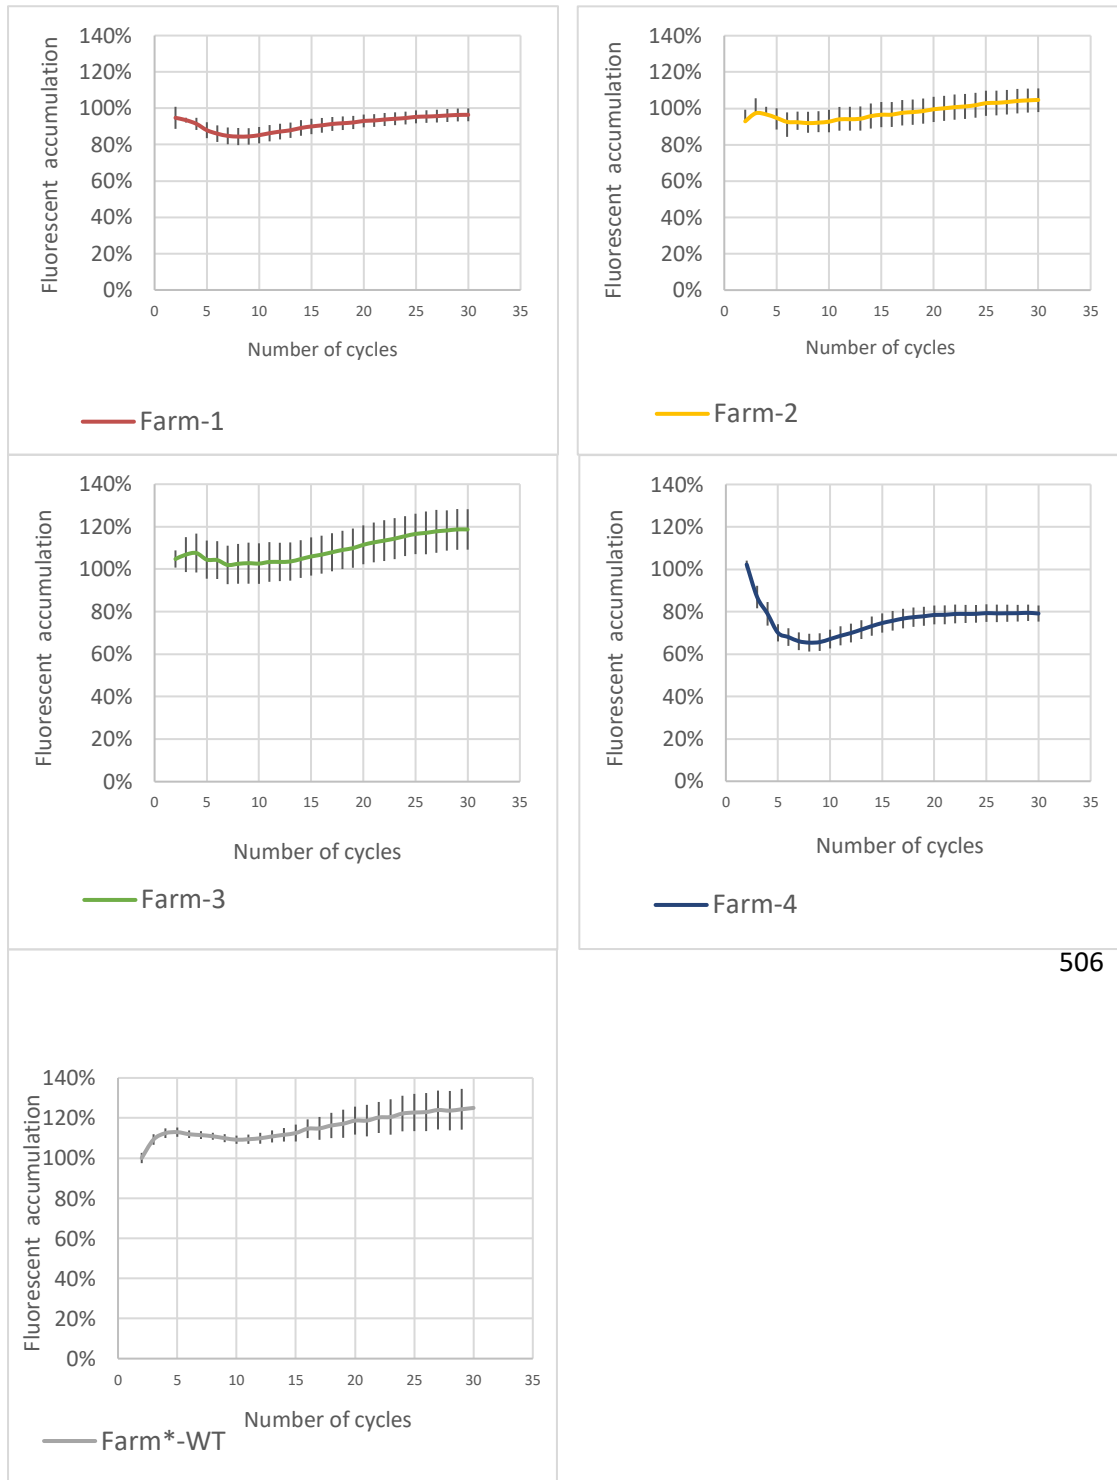

506

516 In each case, fluorescence of an AmpC hyper-producing isolates (Farm-1, -2, etc.) incubated  
517 with the dye is presented relative to that in the control *E. coli* strain EC17 after each cycle.  
518 Each line shows mean data for 3 biological replicates with 8 technical replicates in each.  
519 Error bars define the standard error of the mean.

520



**Figure 3. Phylogenetic tree of farm and human urinary AmpC hyper-producing *E. coli***

The phylogenetic tree was illustrated using the Microreact program using a maximum likelihood tree generated from core genome alignments as described in Materials and Methods. Isolates are coloured green (human urinary) and blue (farm). The ST88 finished reference genome used to generate the alignments is noted in black.

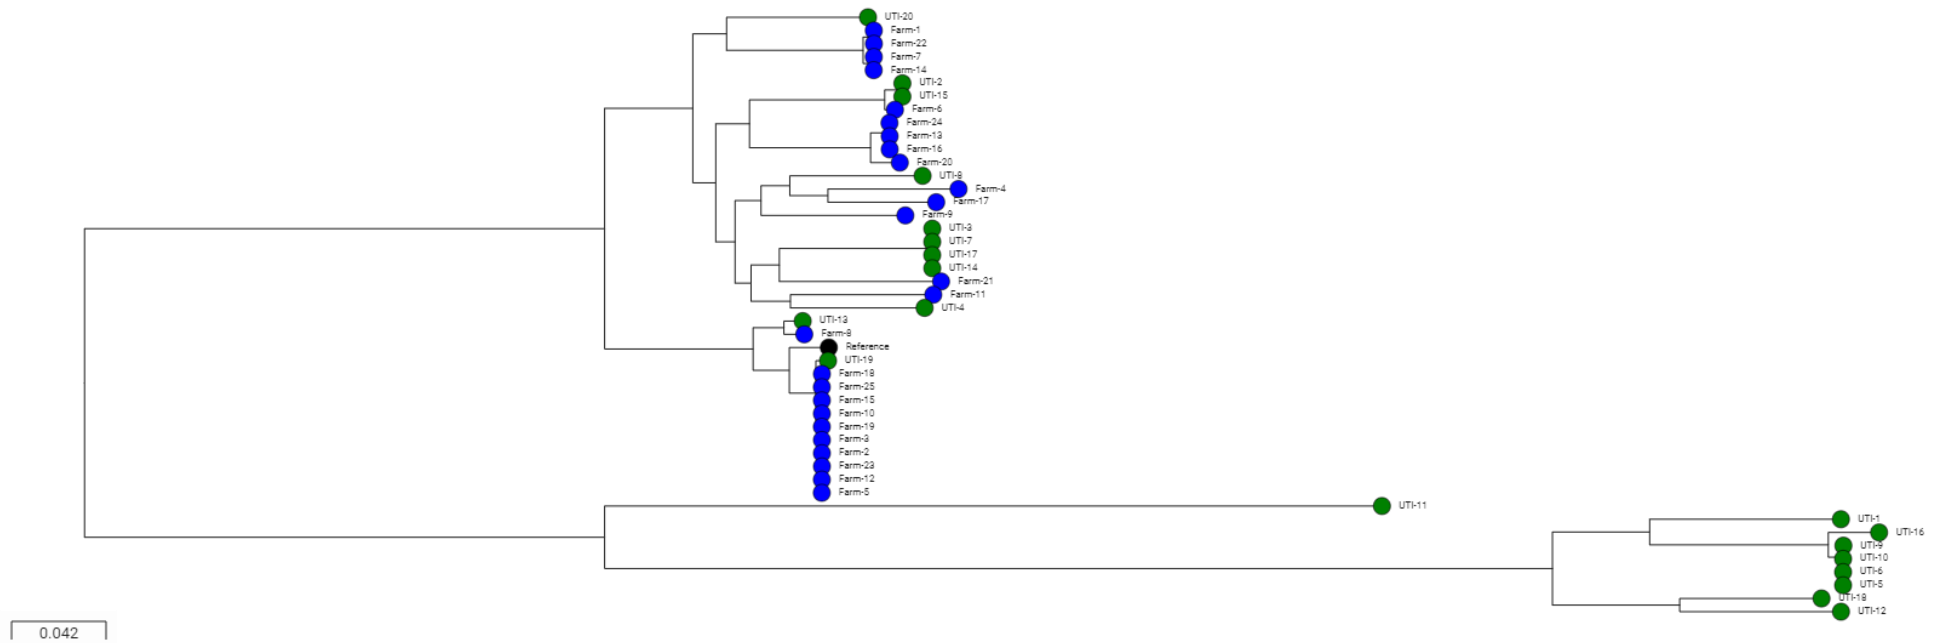

**Figure 4. Promoter/attenuator sequences for *ampC* from 20 human urinary *E. coli* AmpC hyper-producing isolates in comparison with a wild-type *E. coli* EC17 and the isolate from Farm 1**

Modified residues relative to the transcriptional start site are noted and the novel promoter created is annotated.

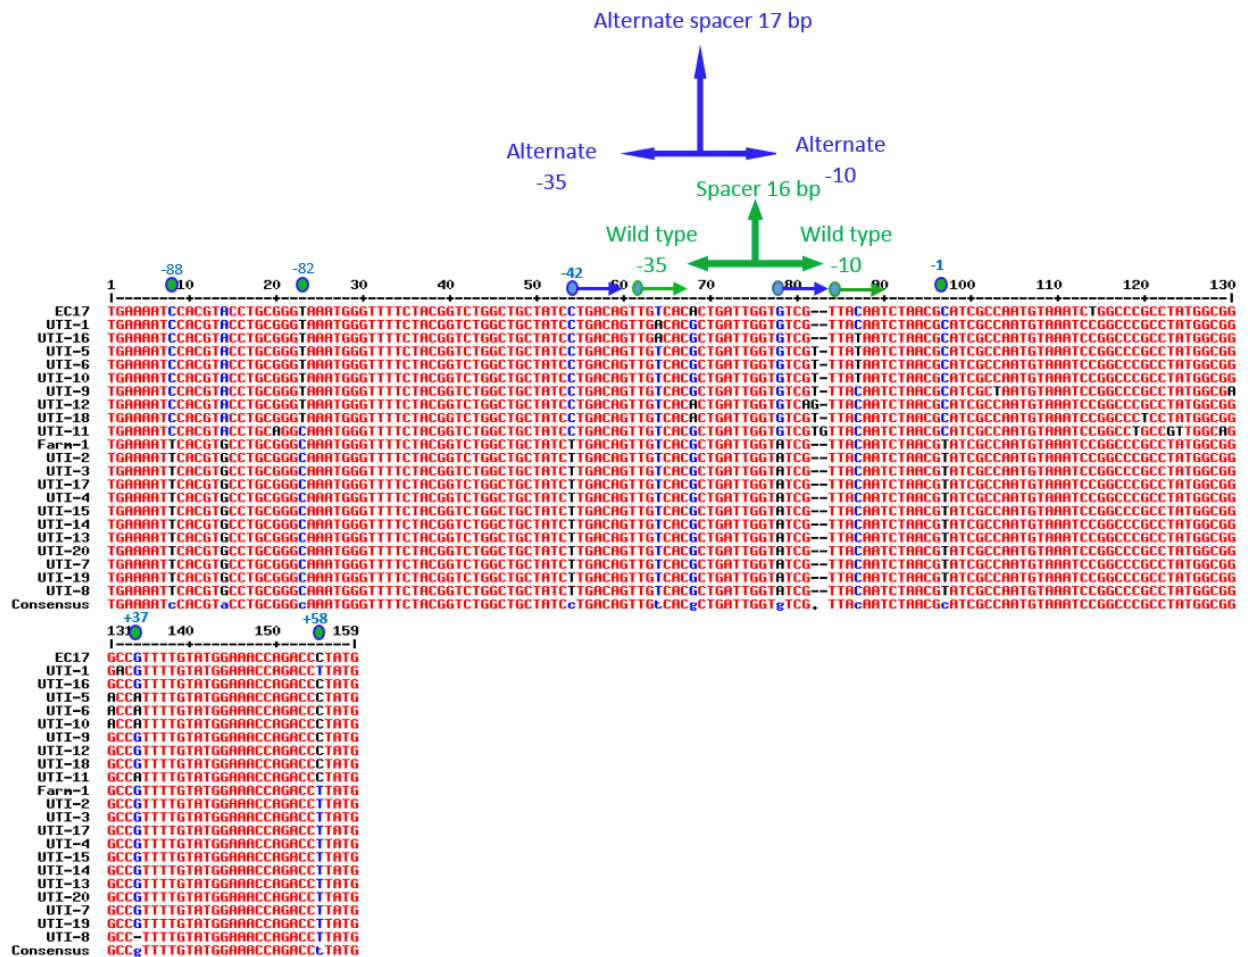

Source: https://www.biorxiv.org/content/10.1101/784694v1.full.pdf
